# Supplementary figures and images for: Effect of increased water intake on plasma copeptin in patients with chronic kidney disease: results from a pilot randomised controlled trial
Source: HighWire-hosted journal article supplement (doi:10.1136/bmjopen-2015-008634), 2015-11-01

### Baseline

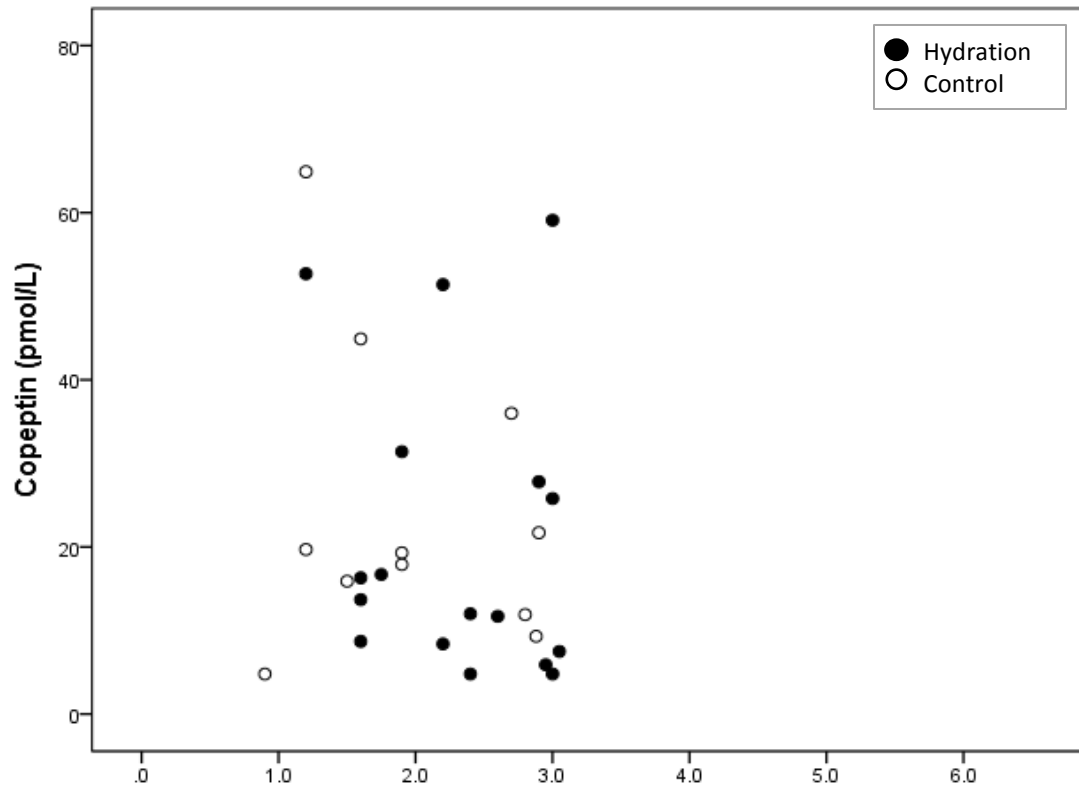

### 6 weeks

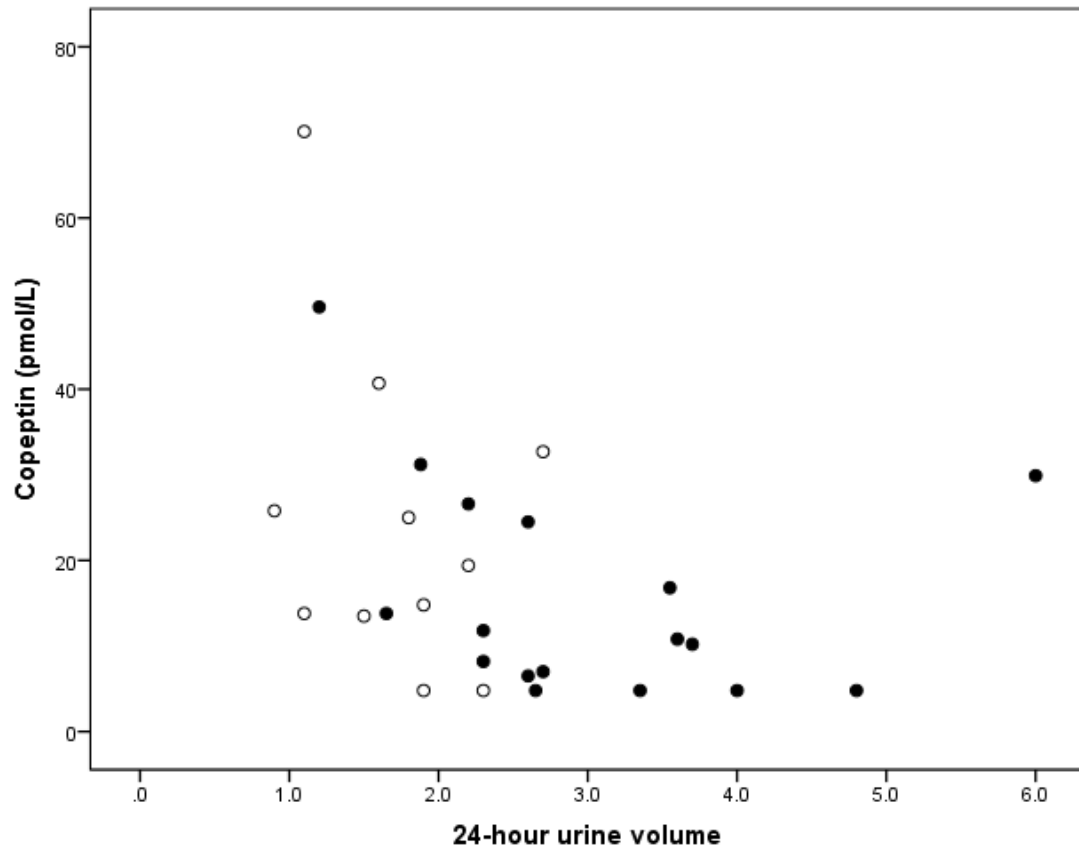

Supplement: bmjopen-2015-008634supp_figure1.pdf [file bmjopen-2015-008634supp_figure1.pdf]

### Baseline

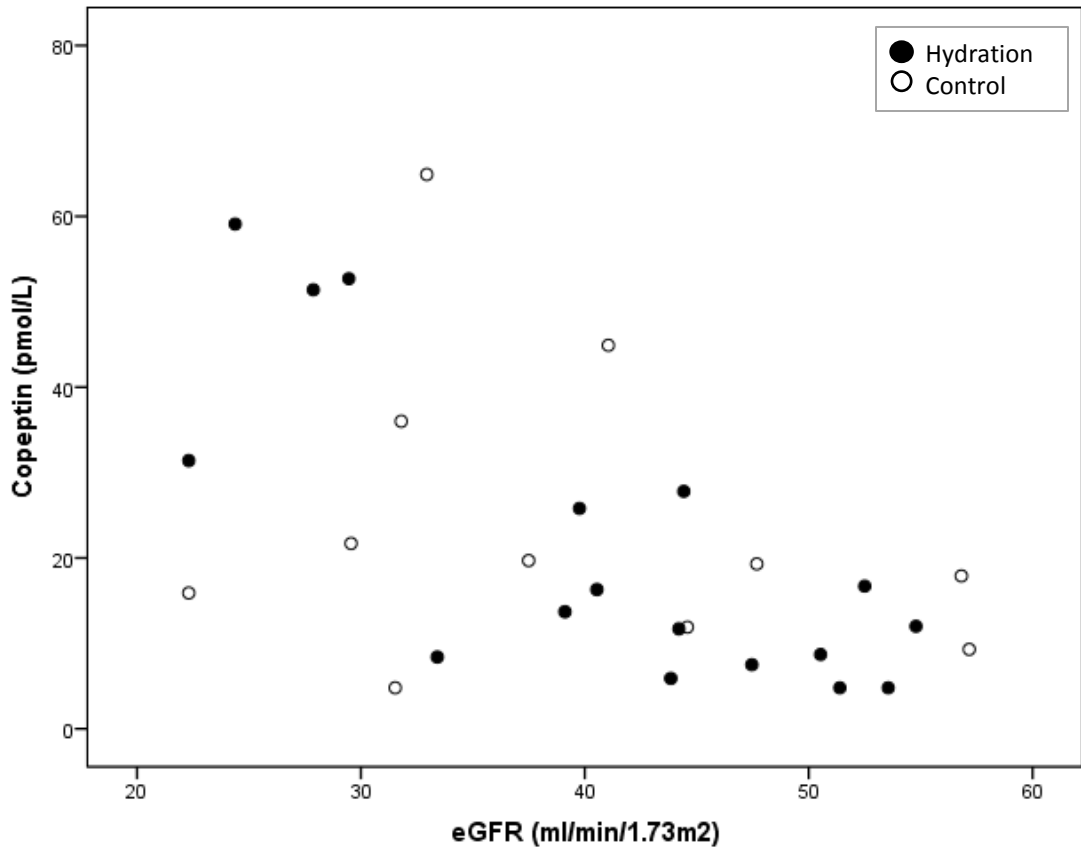

### 6 weeks

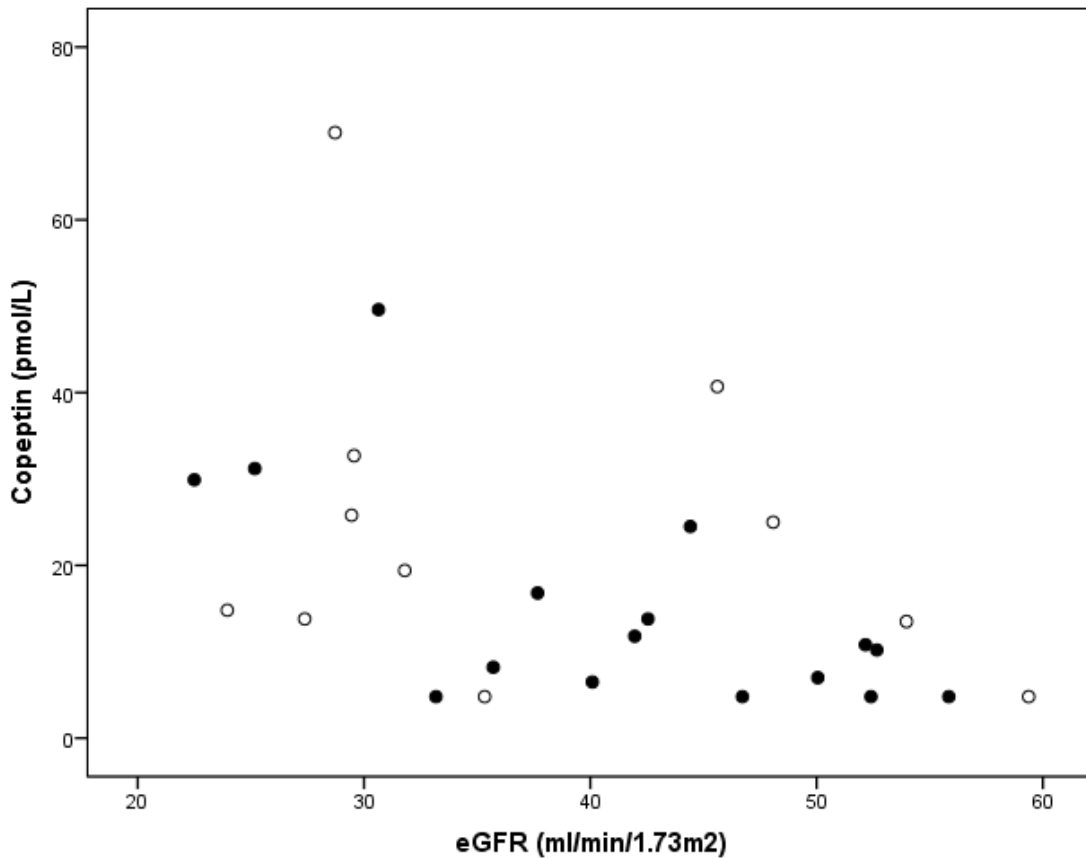

Supplement: bmjopen-2015-008634supp_figure2.pdf [file bmjopen-2015-008634supp_figure2.pdf]

### Baseline

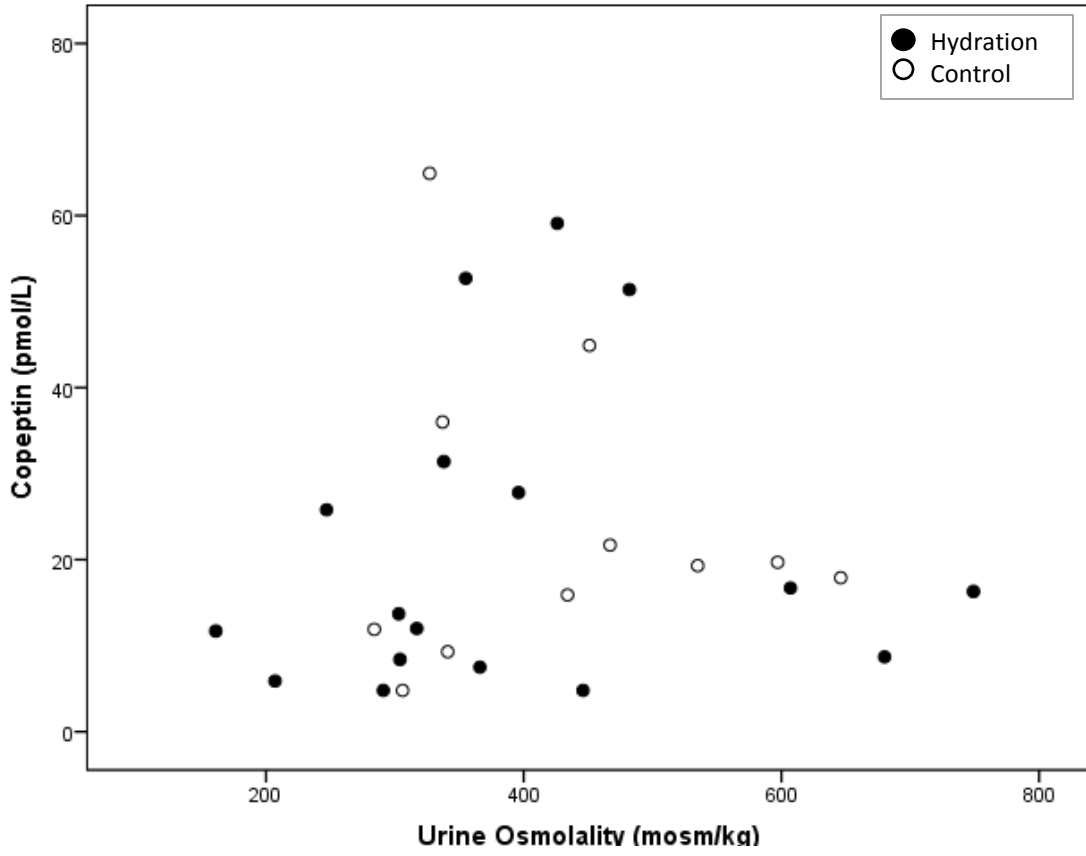

### 6 weeks

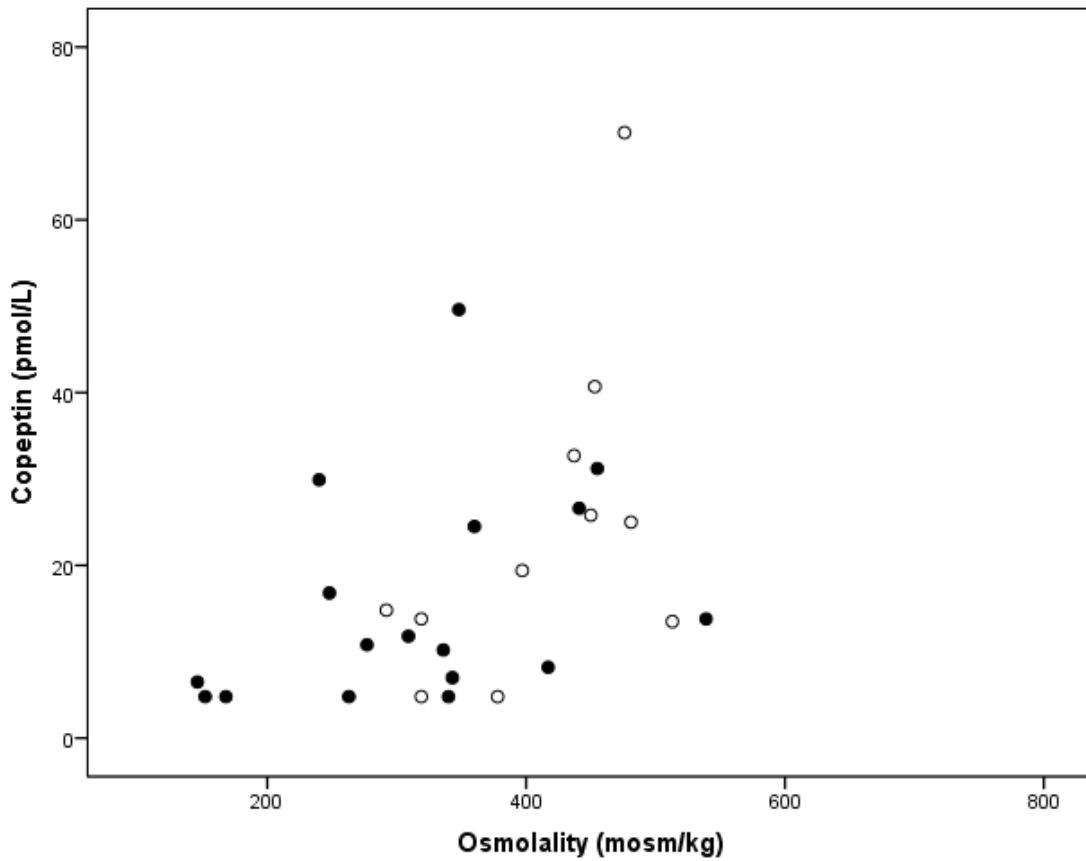

Supplement: bmjopen-2015-008634supp_figure3.pdf [file bmjopen-2015-008634supp_figure3.pdf]

### Baseline

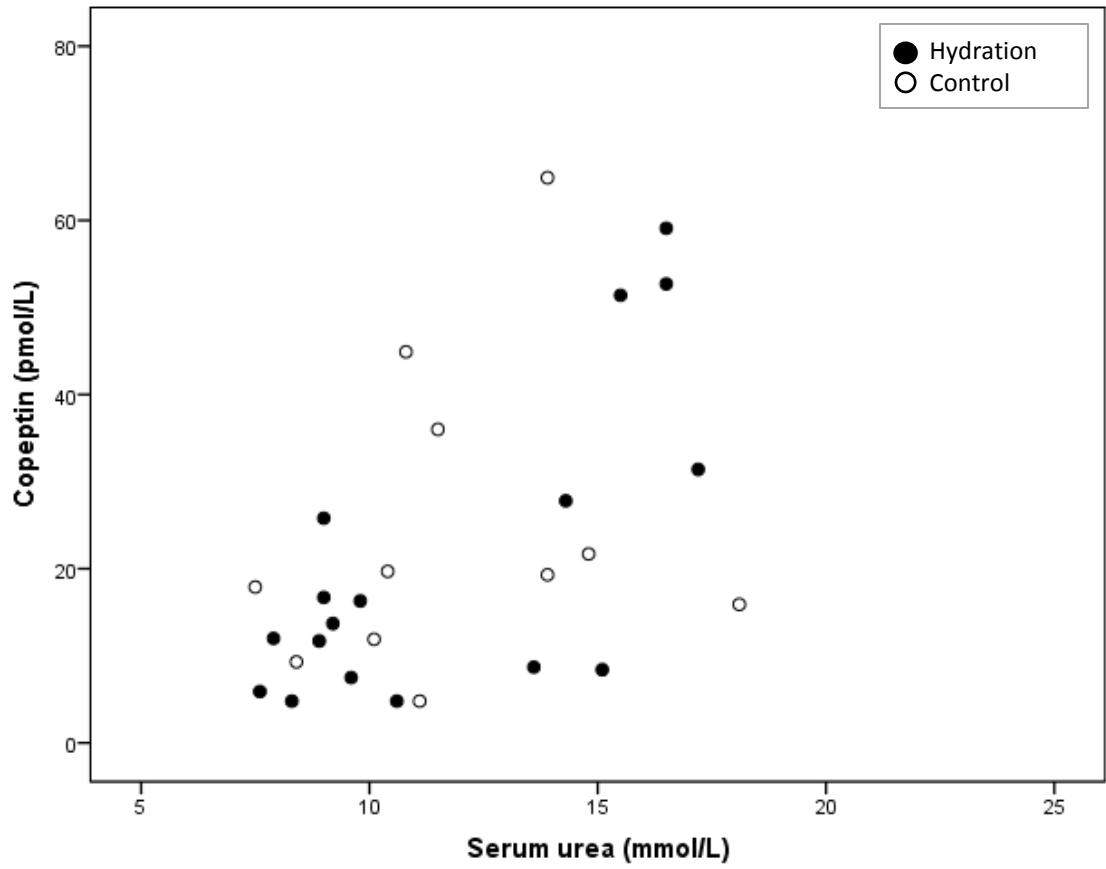

### 6 weeks

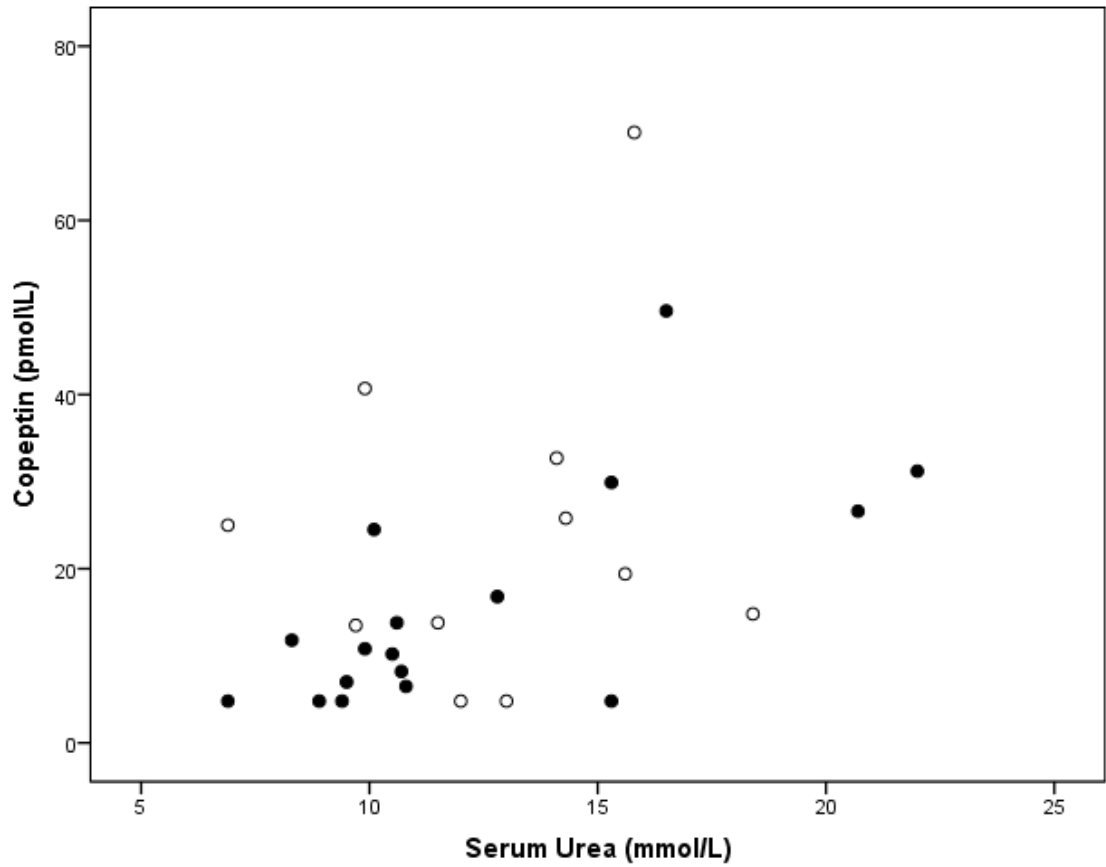

Supplement: bmjopen-2015-008634supp_figure5.pdf [file bmjopen-2015-008634supp_figure5.pdf]

### Baseline

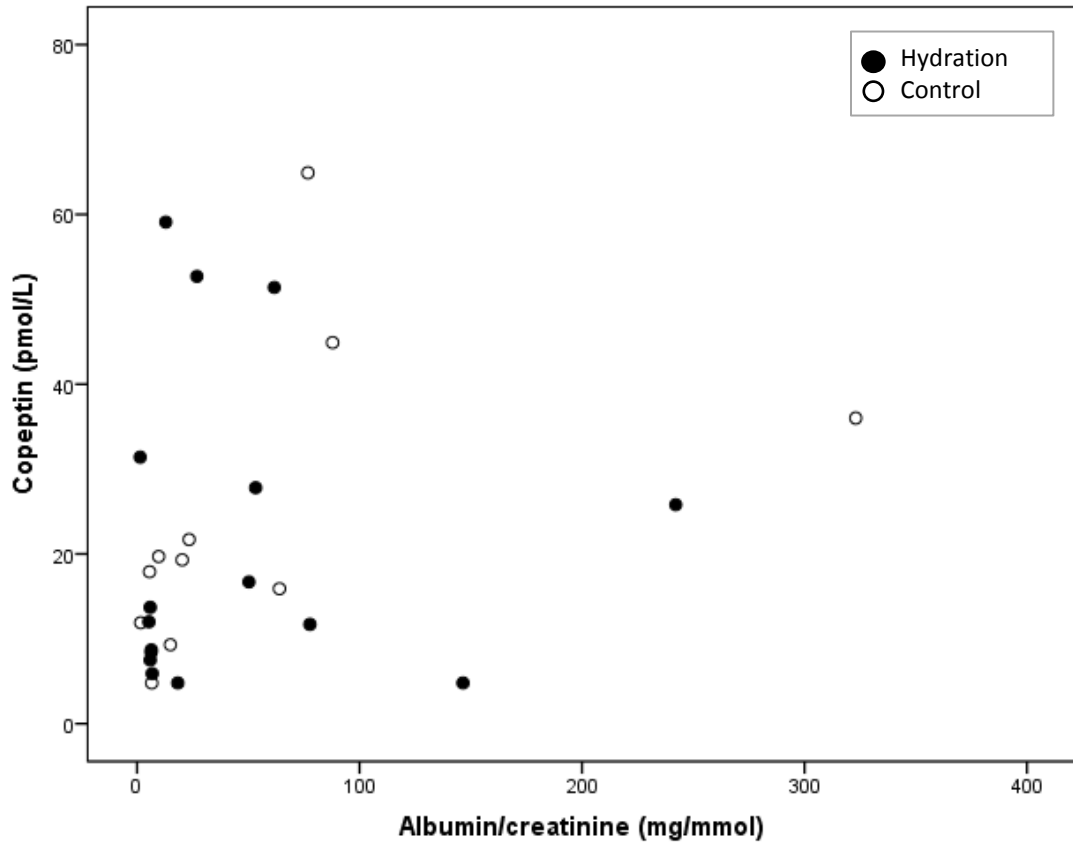

### 6 weeks

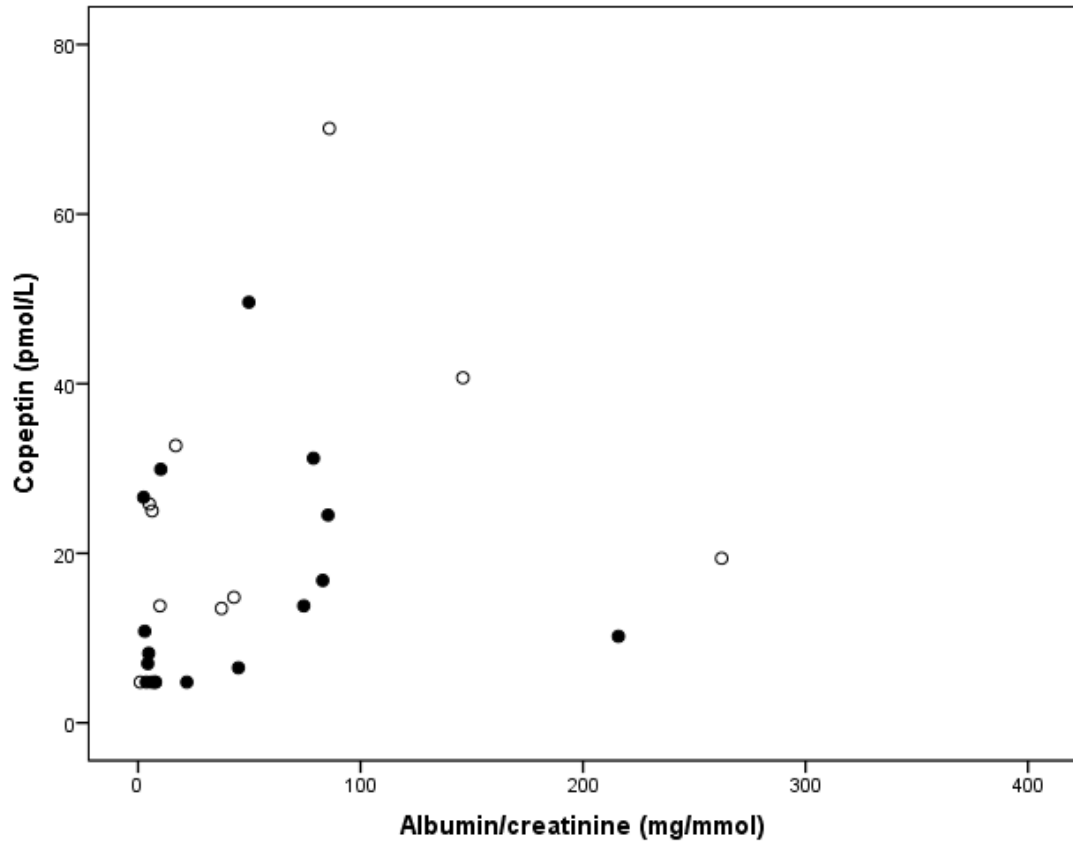

Supplement: bmjopen-2015-008634supp_figure6.pdf [file bmjopen-2015-008634supp_figure6.pdf]

### Baseline

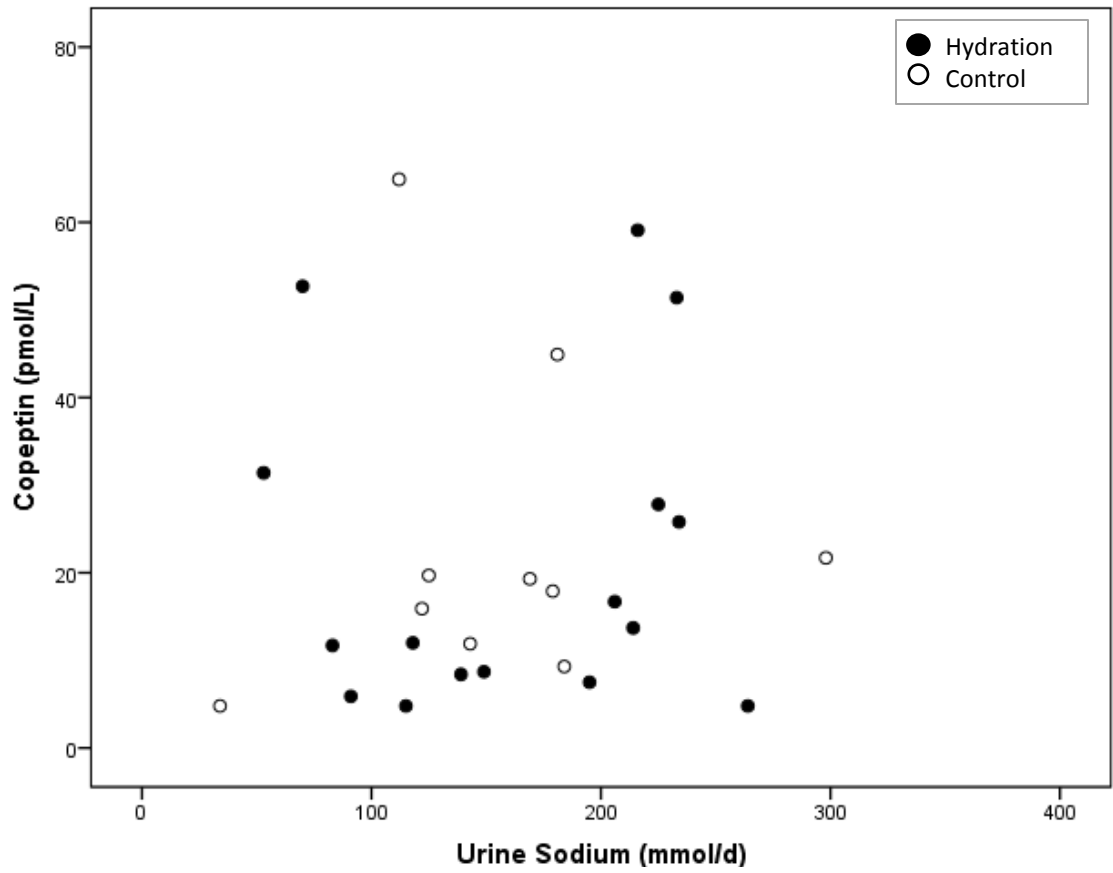

### 6 weeks

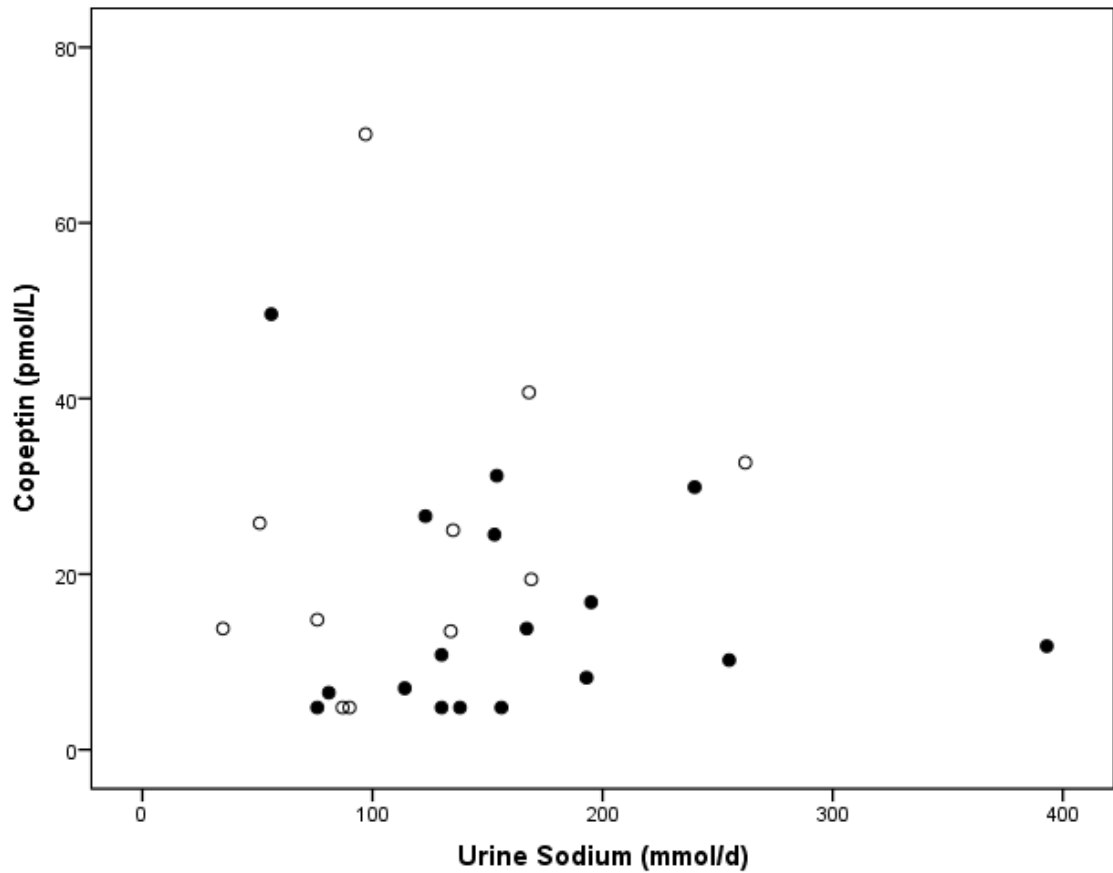

Supplement: bmjopen-2015-008634supp_figure7.pdf [file bmjopen-2015-008634supp_figure7.pdf]

### Baseline

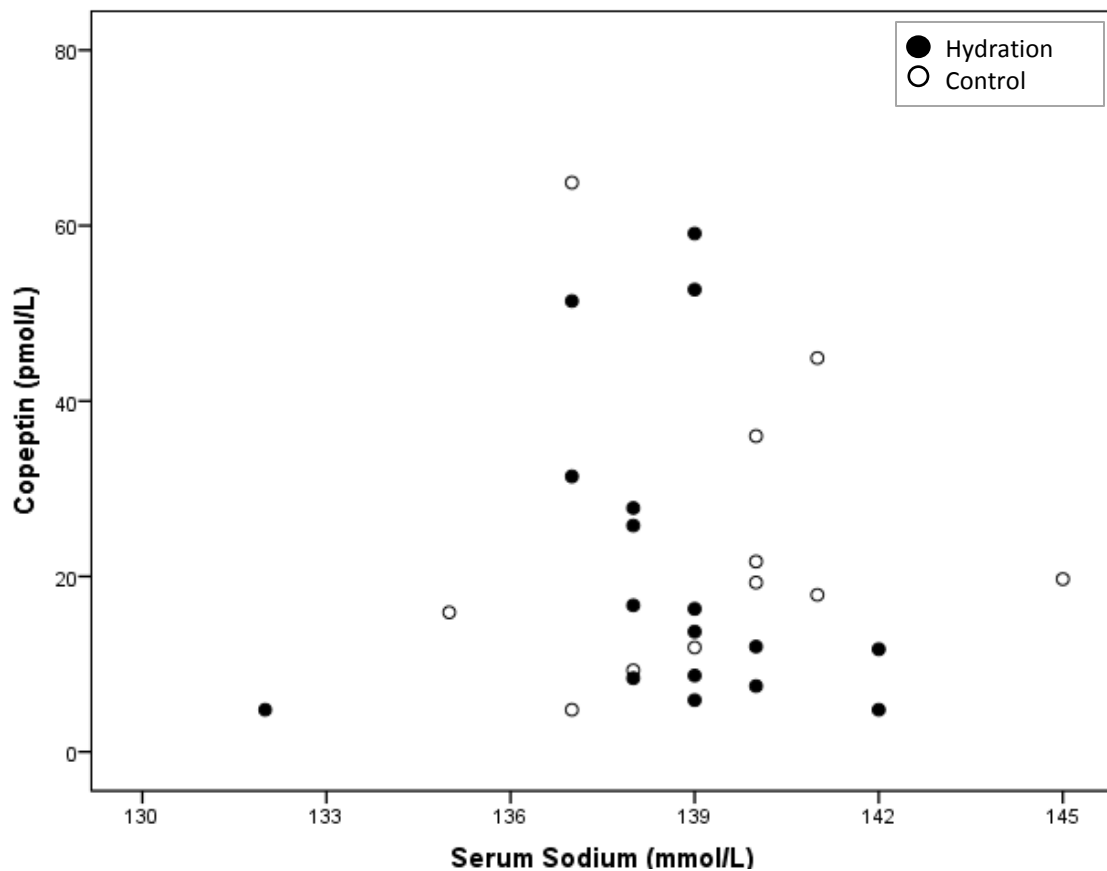

### 6 weeks

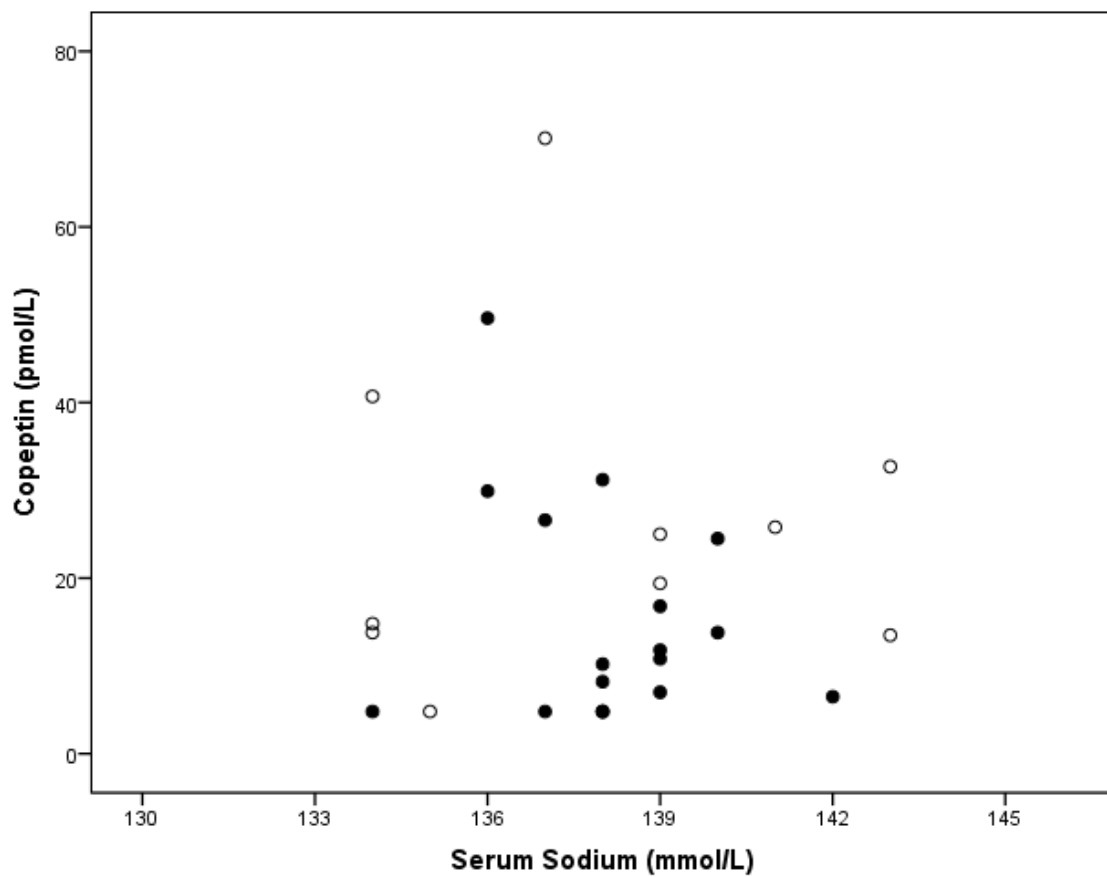

Supplement: bmjopen-2015-008634supp_figure8.pdf [file bmjopen-2015-008634supp_figure8.pdf]
